# Supplementary material
Source: PubMed Central journal article supplement (PMC7771987)

## Supplementary Material

Using  $(\theta, \varphi)$  to denote inclination, and azimuth, respectively, the  $\theta$  and  $\varphi$  of these lines can be given as follows:

$$\begin{cases} \theta \in \{45^\circ, -45^\circ\} \\ \varphi = n * 18^\circ, n \in \{1, \dots, 20\} \end{cases} \quad (3)$$

Radial projection was used to find corresponding prostate surface points at these directions.

To get a total of surface points of 10, 20, 30, 40, 50, 60, 70, 80, 90, 100, we selected one surface point every  $72^\circ, 36^\circ, 24^\circ, 18^\circ, 14.4^\circ, 12^\circ, 10.3^\circ, 9^\circ, 8^\circ, 7.2^\circ$  by changing the angle interval in equation 3. TREs were calculated and plotted against the number of surface points used. As shown in the following figure, when  $n > 40$ , more surface points will only result in marginal benefits. Thus, we empirically chose 40 surface points.

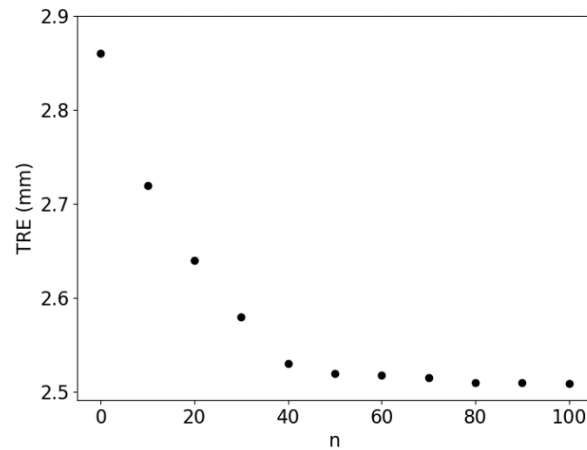

Supplement: NIHMS1655512-supplement-Supplementary.pdf [file NIHMS1655512-supplement-Supplementary.pdf]
